# Supplementary material
Source: PubMed Central journal article supplement (PMC59736)

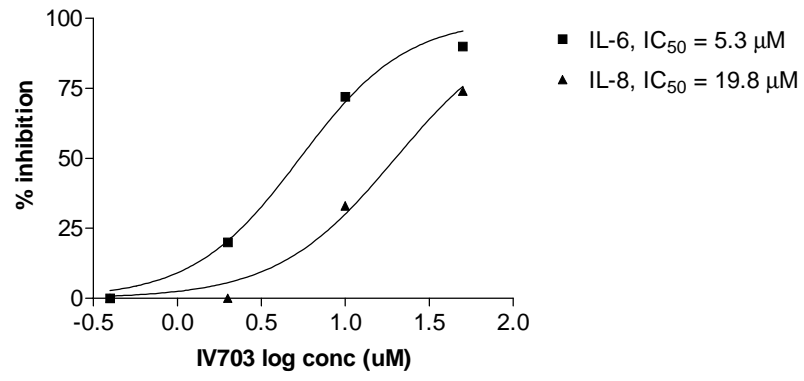

Supplement: pnas_98_21_11879__6.pdf [file pnas_98_21_11879__6.pdf]

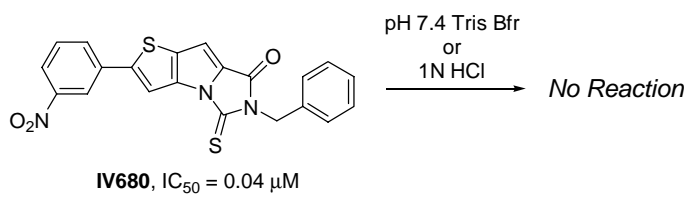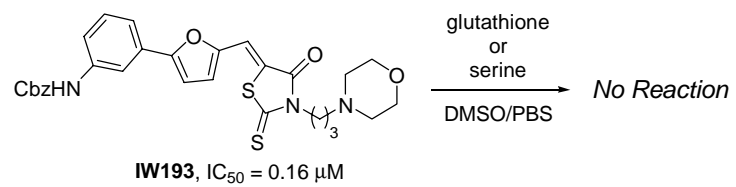

Supplement: pnas_98_21_11879__7.pdf [file pnas_98_21_11879__7.pdf]

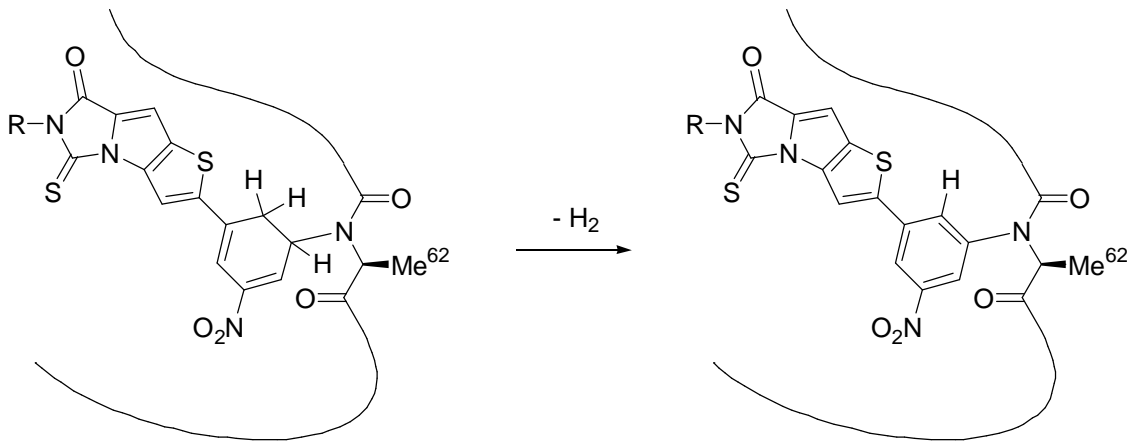

First Neutral IV703/TNFRc1 Adduct

Aromatized IV703/TNFRc1 Adduct

Supplement: pnas_98_21_11879__8.pdf [file pnas_98_21_11879__8.pdf]
